# Supplementary material
Source: publisher figshare collection journal article supplement (https://sage.figshare.com/ndownloader/files/18531173)
Supplement: Supplementary file 1 [file 18531173]

|                                 | <b>n</b> | <b>%</b> |
|---------------------------------|----------|----------|
| <b>Context</b>                  |          |          |
| Physical education (PE)         | 23       | 26.1     |
| Sports                          | 62       | 70.5     |
| PE and sports                   | 3        | 3.4      |
| <b>Location</b>                 |          |          |
| Africa                          | 3        | 3.4      |
| Asia                            | 5        | 5.7      |
| Australia                       | 6        | 6.8      |
| Europe                          | 23       | 26.1     |
| North America                   | 46       | 52.3     |
| South America                   | 3        | 3.4      |
| Cross-continental               | 2        | 2.3      |
| <b>Design</b>                   |          |          |
| Action research                 | 1        | 1.1      |
| Case study                      | 4        | 4.5      |
| Cross-sectional <sup>1</sup>    | 41       | 46.6     |
| Longitudinal-observational      | 15       | 17.0     |
| Pre-test, post-test, no control | 7        | 8.0      |
| Quasi-experimental              | 7        | 8.0      |
| Experimental (true experiment)  | 7        | 8.0      |
| Mixed                           | 6        | 6.8      |
| <b>Method</b>                   |          |          |
| Quantitative                    | 34       | 38.6     |
| Qualitative                     | 39       | 44.3     |
| Mixed method                    | 15       | 17.0     |
| <b>Age group</b>                |          |          |
| Primary school (6-12 y)         | 18       | 20.5     |
| Secondary school (12-18 y)      | 37       | 42.0     |
| Primary and secondary school    | 32       | 36.4     |
| Age range not specified         | 1        | 1.1      |
| <b>Gender</b>                   |          |          |
| Girls only                      | 8        | 9.1      |
| Boys only                       | 12       | 13.6     |
| Girls and boys                  | 68       | 77.3     |

<sup>1</sup>Studies were labelled as cross-sectional when the data was collected from participants at one point in time (Lavrakas, 2008: 171)
